# Supplementary material
Source: PubMed Central journal article supplement (PMC2739421)
Supplement: halms380039-supplement_1.pdf [file halms380039-supplement_1.pdf]

control mice (see fig. 4B-B1). **H**, Quantitative analysis of GFP<sup>+</sup>/GFAP<sup>+</sup> cells expressing S100B. At least 400 GFP<sup>+</sup>/GFAP<sup>+</sup> cells were counted and *n* the number of transplanted mice. Errors are  $\pm$  SD. Scale bars: 50  $\mu$ m in G and 20  $\mu$ m in G1.

**Figure 7.** Model of GFAP<sup>+</sup> astrocytic development. The onset of GFAP expression in parallel with the progressive down-regulation of RC2 characterizes the stage I and the stage II respectively. Next, GFAP<sup>+</sup> astrocytes continue their developmental program and the onset of S100B expression defines the stage III. This stage includes restricted astrocyte precursors and terminally differentiated astrocytes. EGF signaling exerts a double effect on GFAP<sup>+</sup> astrocytic development. It activates the transition from stage I to the stage II and blocks the transition from stage II to stage III.

### Supplemental figures

**Supplemental figure 1.** At P2, S100B is expressed by oligodendroglial cells. P2 coronal sections were double immunolabeled as indicated in the figure. Cells expressing S100B in neocortex at P2 mostly express the proteoglycan NG2 (98 $\pm$ 1%, *n*=2 mice, 141 counted cells), PDGFR- $\alpha$  (97 $\pm$ 2%, *n*=2, 158 counted cells) and Olig2 (81 $\pm$ 5%, *n*=2, 185 counted cells) and likely correspond to oligodendroglial cells. Arrowheads point to double-labeled cells. Arrows point to NG2<sup>+</sup> (A), PDGFR- $\alpha$ <sup>+</sup> (B) and Olig2<sup>+</sup> (C) cells which do not express S100B. Images result from the superposition of 10 confocal -y focal sections. Scale bar: 50  $\mu$ m in A, 20  $\mu$ m in B and C.

**Supplemental figure 5.** Transplanted astrocytic cells integrate the host brain. A-B, 15 DIV astrocytic cultures derived from transgenic  $\alpha$ -actin GFP-mice were dissociated and cells were injected into the striatum of C57/BL6 host mice. After 4 weeks, grafted astrocytes extended thin process (arrowheads) and developed astrocyte end-feet (arrows) around blood vessels (asterisks in A1 and B1). A1 and B1 are higher power views of the areas squared in A and B respectively. Nuclear counterstaining was performed with To-pro 3. Scale bar: 10  $\mu$ m .

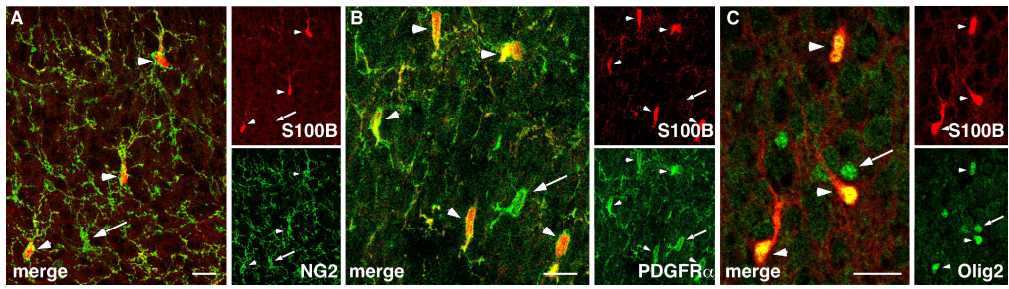

# To-pro 3/GFP

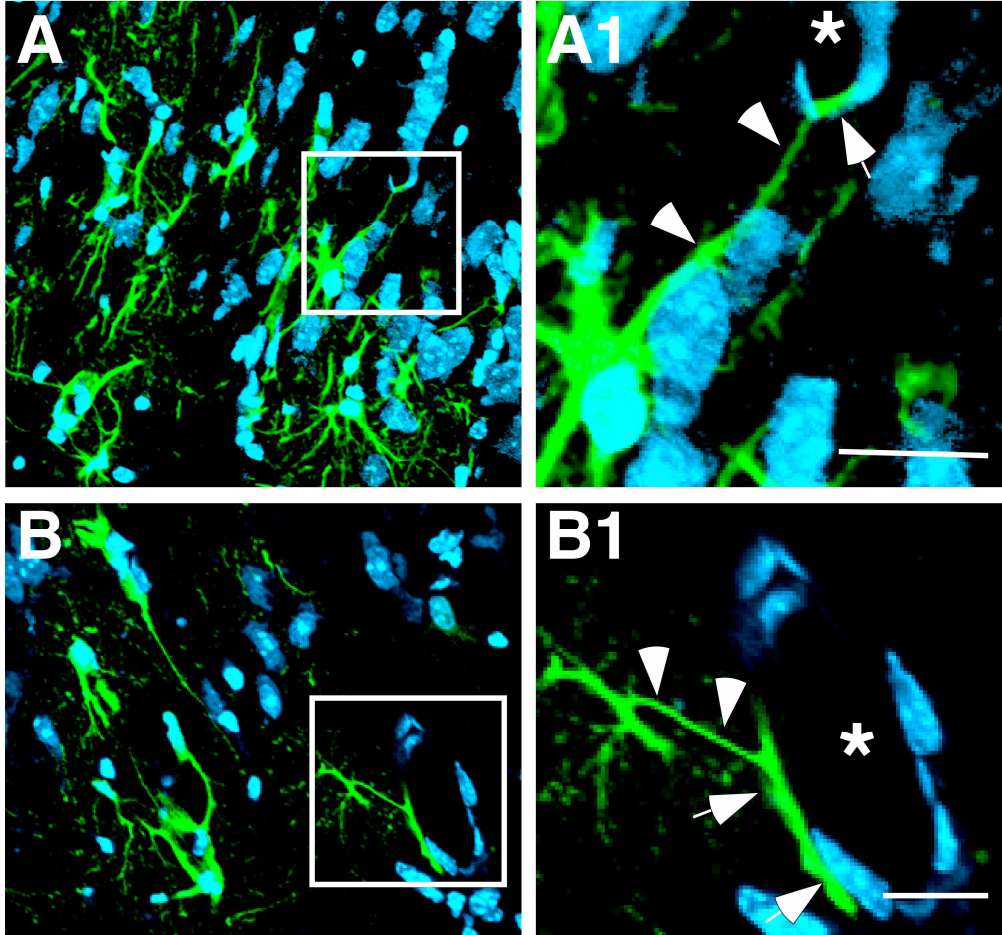

inserm-00380039, version 1 - 16 Jul 2009
